# Supplementary material for: Seroprevalence of Major Pasture-Borne Parasitoses (Gastrointestinal Nematodes, Liver Flukes and Lungworms) in German Dairy Cattle Herds, Association with Management Factors and Impact on Production Parameters
Source: MDPI journal article supplement (doi:10.3390/ani11072078), 2021-07-12
Supplement: s1 [file s1]

**Table S1.** Qualitative predictor variables for logistic regression regarding management factors associated with *O. ostertagi*, *F. hepatica* and *D. viviparus* BTM ELISA results. Abbreviations: N, Number of farms

|                                                                                  | Northwest  |               | Northeast  |               | Bavaria    |               | Total      |               |
|----------------------------------------------------------------------------------|------------|---------------|------------|---------------|------------|---------------|------------|---------------|
|                                                                                  | N          | %             | N          | %             | N          | %             | N          | %             |
| <b>Access to pasture/fresh grass</b>                                             |            |               |            |               |            |               |            |               |
| Yes                                                                              | 96         | 47.76         | 51         | 24.88         | 77         | 31.95         | 224        | 34.62         |
| No                                                                               | 101        | 50.25         | 142        | 69.27         | 146        | 60.58         | 389        | 60.12         |
| Unknown                                                                          | 4          | 1.99          | 12         | 5.85          | 18         | 7.47          | 34         | 5.26          |
| <b>Floor dried hay</b>                                                           |            |               |            |               |            |               |            |               |
| Floor dried hay <sup>a</sup>                                                     | 2          | 1.00          | 14         | 6.83          | 47         | 19.50         | 63         | 9.74          |
| Other dried hay                                                                  | 0          | 0             | 0          | 0             | 8          | 3.32          | 8          | 1.24          |
| No or low hay percentage in ration                                               | 196        | 97.51         | 189        | 92.20         | 182        | 75.52         | 567        | 87.64         |
| Unknown                                                                          | 3          | 1.49          | 2          | 0.98          | 4          | 1.66          | 9          | 1.39          |
| <b>Silage and hay quality</b>                                                    |            |               |            |               |            |               |            |               |
| Normal/slightly lower quality                                                    | 80         | 39.80         | 121        | 59.02         | 112        | 46.47         | 313        | 48.38         |
| At least 1 silage with significantly lower quality                               | 14         | 6.97          | 14         | 6.83          | 25         | 10.37         | 53         | 8.19          |
| At least 1 spoiled silage                                                        | 102        | 50.75         | 61         | 29.76         | 93         | 38.59         | 256        | 39.57         |
| Unknown                                                                          | 5          | 2.49          | 9          | 4.39          | 11         | 4.56          | 25         | 3.86          |
| <b>Presence of fully slatted floor</b>                                           |            |               |            |               |            |               |            |               |
| Yes <sup>b</sup>                                                                 | 1          | 0.50          | 1          | 0.49          | 6          | 2.49          | 8          | 1.24          |
| No                                                                               | 200        | 99.50         | 203        | 99.02         | 235        | 97.51         | 638        | 98.61         |
| Unknown                                                                          | 0          | 0             | 1          | 0.49          | 0          | 0             | 1          | 0.15          |
| <b>Anthelmintic treatment in calves<sup>c</sup> and young cattle<sup>d</sup></b> |            |               |            |               |            |               |            |               |
| Calves and young cattle                                                          | 34         | 16.92         | 7          | 3.41          | 18         | 7.47          | 59         | 9.12          |
| Only calves <sup>e</sup>                                                         | 3          | 1.49          | 4          | 1.95          | 3          | 1.24          | 10         | 1.55          |
| Only young cattle                                                                | 111        | 55.22         | 68         | 33.17         | 67         | 27.80         | 246        | 38.02         |
| No anthelmintic treatment                                                        | 50         | 24.88         | 125        | 60.98         | 152        | 63.07         | 327        | 50.54         |
| Unknown                                                                          | 3          | 1.49          | 1          | 0.49          | 1          | 0.41          | 5          | 0.77          |
| <b>Anthelmintic treatment in lactating and dry cows</b>                          |            |               |            |               |            |               |            |               |
| Lactating and dry cows                                                           | 81         | 40.30         | 27         | 13.17         | 36         | 14.94         | 144        | 22.26         |
| Only dry cows                                                                    | 7          | 3.48          | 12         | 5.85          | 7          | 2.90          | 26         | 4.02          |
| Only lactating cows <sup>e</sup>                                                 | 14         | 6.97          | 9          | 4.39          | 4          | 1.66          | 27         | 4.17          |
| No anthelmintic treatment                                                        | 99         | 49.25         | 157        | 76.59         | 194        | 80.50         | 450        | 69.55         |
| <b>All</b>                                                                       | <b>201</b> | <b>100.00</b> | <b>205</b> | <b>100.00</b> | <b>241</b> | <b>100.00</b> | <b>647</b> | <b>100.00</b> |

<sup>a</sup> If < 5 farms in the category, these were counted as “no or low hay percentage in ration”

<sup>b</sup> If < 5 farms in the category, these were counted as “no presence of fully slatted floors”

<sup>c</sup> Pre-weaning or < 6 months of age

<sup>d</sup> Weaning/6 months of age to first calving

<sup>e</sup> If < 5 farms in the category, these were counted as “no anthelmintic usage”
