# Supplementary material for: Seroprevalence of Major Pasture-Borne Parasitoses (Gastrointestinal Nematodes, Liver Flukes and Lungworms) in German Dairy Cattle Herds, Association with Management Factors and Impact on Production Parameters
Source: MDPI journal article supplement (doi:10.3390/ani11072078), 2021-07-12
Supplement: s1 [file s1]

**Table S2:** Results from linear models investigating the association of *Ostertagia ostertagi* and *Fasciola hepatica* BTM ELISA results with average annual milk yield (kg), average milk protein (%) and average milk fat (%) content in high performance dairy (HD) and dual-purpose (DP) herds in southern Germany. Seropositivity categories are defined as follows: *O. ostertagi*: +: ODR  $\geq$  0.5, ++: ODR  $\geq$  0.8; *F. hepatica*: +: 30% < S/P  $\leq$  80%, ++: 80% < S/P < 150%, +++: S/P  $\geq$  150%.

|                                        | HD (N = 27) <sup>a</sup> |                        |       |              | DP (N = 161)           |                        |       |                   |
|----------------------------------------|--------------------------|------------------------|-------|--------------|------------------------|------------------------|-------|-------------------|
|                                        | Estimate                 | SE                     | t     | P-value      | Estimate               | SE                     | t     | P-value           |
| <b>Milk yield (kg)<sup>b</sup></b>     |                          |                        |       |              |                        |                        |       |                   |
| Intercept                              | 14852.65                 | 5802.40                | 2.56  | <b>0.020</b> | 8951.27                | 1746.67                | 5.13  | <b>&lt; 0.001</b> |
| <i>O. ostertagi</i> +                  | 117.36                   | 330.26                 | 0.36  | 0.727        | -103.93                | 248.01                 | -0.42 | 0.676             |
| <i>O. ostertagi</i> ++                 | -                        | -                      | -     | -            | -107.09                | 406.23                 | -0.26 | 0.792             |
| <i>F. hepatica</i> +                   | -939.71                  | 457.04                 | -2.06 | 0.056        | 19.18                  | 499.30                 | 0.04  | 0.969             |
| <i>F. hepatica</i> ++                  | -296.89                  | 578.31                 | -0.51 | 0.614        | -363.50                | 347.90                 | -1.05 | 0.298             |
| <i>F. hepatica</i> +++                 | -2411.40                 | 898.22                 | -2.69 | <b>0.016</b> | 843.24                 | 384.11                 | 2.20  | <b>0.030</b>      |
| Lactation no.                          | -3882.50                 | 4028.61                | -0.96 | 0.349        | -668.34                | 1134.60                | -0.59 | 0.557             |
| Lactation no. (squared)                | 586.24                   | 662.85                 | 0.88  | 0.389        | 104.52                 | 183.55                 | 0.57  | 0.570             |
| SCS                                    | -1.50                    | 2.33                   | -0.65 | 0.528        | -3.12                  | 0.95                   | -3.27 | <b>0.001</b>      |
| No. of lactating animals               | 7.83                     | 3.27                   | 2.39  | <b>0.029</b> | 9.97                   | 3.49                   | 2.86  | <b>0.005</b>      |
| Farm type (ORG vs. CON)                | 271.69                   | 644.91                 | 0.42  | 0.679        | -1606.45               | 340.18                 | -4.72 | <b>&lt; 0.001</b> |
| Farm type (TRA vs. CON)                | -                        | -                      | -     | -            | -523.23                | 452.80                 | -1.16 | 0.250             |
| <b>Protein content (%)<sup>c</sup></b> |                          |                        |       |              |                        |                        |       |                   |
| Intercept                              | 4.64                     | 1.11                   | 4.17  | <b>0.001</b> | 3.61                   | 0.20                   | 18.41 | <b>&lt; 0.001</b> |
| <i>O. ostertagi</i> +                  | 0.07                     | 0.06                   | 1.12  | 0.278        | 0.01                   | 0.03                   | 0.46  | 0.647             |
| <i>O. ostertagi</i> ++                 | -                        | -                      | -     | -            | 0.01                   | 0.04                   | 0.31  | 0.756             |
| <i>F. hepatica</i> +                   | -0.06                    | 0.10                   | -0.63 | 0.535        | -0.04                  | 0.05                   | -0.82 | 0.414             |
| <i>F. hepatica</i> ++                  | 0.05                     | 0.11                   | 0.43  | 0.671        | -0.07                  | 0.04                   | -1.94 | 0.054             |
| <i>F. hepatica</i> +++                 | -0.43                    | 0.20                   | -2.18 | <b>0.043</b> | -0.04                  | 0.04                   | -0.96 | 0.339             |
| Lactation no.                          | -0.42                    | 0.71                   | -0.59 | 0.563        | -0.22                  | 0.12                   | -1.87 | 0.063             |
| Lactation no. (squared)                | 0.08                     | 0.12                   | 0.66  | 0.520        | 0.03                   | 0.02                   | 1.57  | 0.119             |
| SCS                                    | 9.24 x10 <sup>-5</sup>   | 4.45 x10 <sup>-4</sup> | 0.21  | 0.838        | 3.71 x10 <sup>-4</sup> | 1.04 x10 <sup>-4</sup> | 3.58  | <b>&lt; 0.001</b> |
| farm type (ORG vs. CON)                | 0.08                     | 0.12                   | 0.64  | 0.533        | -0.11                  | 0.04                   | -2.93 | <b>0.004</b>      |

|                                 |                         |                        |       |       |                         |                        |       |                  |
|---------------------------------|-------------------------|------------------------|-------|-------|-------------------------|------------------------|-------|------------------|
| farm type (TRA vs. CON)         | -                       | -                      | -     | -     | -0.09                   | 0.05                   | -1.81 | 0.073            |
| Milk yield                      | -6.28 x10 <sup>-5</sup> | 3.96 x10 <sup>-5</sup> | -1.59 | 0.131 | 2.82 x10 <sup>-5</sup>  | 8.37 x10 <sup>-5</sup> | 3.36  | <b>0.001</b>     |
| <b>Milk fat (%)<sup>d</sup></b> |                         |                        |       |       |                         |                        |       |                  |
| Intercept                       | 2.74                    | 1.63                   | 1.69  | 0.111 | 4.15                    | 0.35                   | 11.83 | <b>&lt;0.001</b> |
| <i>O. ostertagi</i> +           | -0.13                   | 0.08                   | -1.58 | 0.133 | -0.07                   | 0.05                   | -1.59 | 0.114            |
| <i>O. ostertagi</i> ++          | -                       | -                      | -     | -     | -0.15                   | 0.08                   | -2.00 | <b>0.047</b>     |
| <i>F. hepatica</i> +            | -0.10                   | 0.12                   | -0.85 | 0.408 | 0.06                    | 0.09                   | 0.61  | 0.545            |
| <i>F. hepatica</i> ++           | -0.13                   | 0.14                   | -0.93 | 0.365 | -0.07                   | 0.06                   | -1.08 | 0.280            |
| <i>F. hepatica</i> +++          | -0.05                   | 0.26                   | -0.20 | 0.845 | -0.06                   | 0.07                   | -0.89 | 0.377            |
| Lactation no.                   | 1.80                    | 0.99                   | 1.83  | 0.086 | 0.15                    | 0.21                   | 0.73  | 0.467            |
| Lactation no. (squared)         | -0.32                   | 0.16                   | -1.97 | 0.066 | -0.03                   | 0.03                   | -0.92 | 0.357            |
| SCS                             | -1.18 x10 <sup>-3</sup> | 5.62 x10 <sup>-4</sup> | -2.10 | 0.052 | 3.36 x10 <sup>-4</sup>  | 1.83 x10 <sup>-4</sup> | 1.83  | 0.069            |
| No. of producing animals        | -1.68 x10 <sup>-3</sup> | 9.01 x10 <sup>-4</sup> | -1.87 | 0.080 | -1.38 x10 <sup>-4</sup> | 6.64 x10 <sup>-4</sup> | -0.21 | 0.836            |
| Farm type (ORG vs. CON)         | 0.01                    | 0.15                   | 0.05  | 0.961 | -0.07                   | 0.07                   | -1.00 | 0.318            |
| Farm type (TRA vs. CON)         | -                       | -                      | -     | -     | -0.07                   | 0.08                   | -0.84 | 0.401            |
| Milk yield                      | -6.93 x10 <sup>-5</sup> | 5.78 x10 <sup>-5</sup> | -1.20 | 0.248 | -2.54 x10 <sup>-5</sup> | 1.52 x10 <sup>-5</sup> | -1.67 | 0.097            |

<sup>a</sup> One outlier was excluded

<sup>b</sup> Full models were significantly different from null models containing only an intercept (HD: Df = 9, F = 6.9,  $P < 0.001$ ; DP: Df = 11, F = 6.8,  $P < 0.001$ )

<sup>c</sup> Only the DP model was significantly different from a null model containing only the intercept (HD: Df = 9, F = 0.99,  $P = 0.480$ ; DP: Df = 11, F = 6.2,  $P < 0.001$ )

<sup>d</sup> Only the DP model was significantly different from a null model containing only the intercept (HD: Df = 10, F = 2.2,  $P = 0.079$ ; DP: Df = 12, F = 2.7,  $P = 0.003$ )

Abbreviations: ORG, organic; CON, conventional; TRA, in transition from conventional to organic; SE, standard error; SCS, somatic cell score
